# Supplementary material for: Workplace experiences of mental health consumer peer workers in New South Wales, Australia: a survey study exploring job satisfaction, burnout and turnover intention
Source: PubMed Central journal article supplement (PMC7268613; doi:10.1186/s12888-020-02688-9), 2020-06-01
Supplement: 12888_2020_2688_MOESM1_ESM.pdf [file 12888_2020_2688_MOESM1_ESM.pdf]

# Workforce survey of consumer workers / peer workers in mental health services

**This survey is designed to explore the workplace experiences of individuals with lived experience of mental illness and recovery who work in designated peer worker / consumer worker roles. This will help to understand the enjoyable and challenging aspects of these roles and to make recommendations that might improve the workplace experiences of peer workers / consumer workers.**

While we recognise that many people who work in the mental health system have their own experience of mental illness and recovery (and often use this as an aspect of their role), this study is particularly interested in exploring the experiences and perspectives of individuals who are working in identified peer / consumer roles.

**This questionnaire will take approximately 30 minutes to complete.**

*Your participation in this project is entirely voluntary. Your choice to participate or not will have no impact on your relationships with others in the organisation.*

## INCLUSION CRITERIA

Are you currently employed in an identified peer worker / consumer worker position. That is, a position where “lived experience of mental illness and recovery” (or another similar criterion) is a specific selection criterion?  Yes  No

Do you work in Australia?  Yes  No

If you answered “**Yes**” to both questions, please proceed. If you answered “**No**” to either question, thanks for your interest, but you are not eligible for participation in this study.

## INFORMATION ABOUT YOU

***What is your gender / gender identity?***

***What is your age?***

- 25 or under       26-30       31-40       41-50  
 51-60       61-70       71 or over       I'd rather not say

***Which state / territory do you work in***

- Australian Capital Territory       New South Wales  
 Northern Territory       Queensland  
 South Australia       Tasmania  
 Victoria       Western Australia

***Is the location where you work:***

- Metropolitan       Regional  
 Rural       Remote

## INFORMATION ABOUT YOUR CURRENT PEER / CONSUMER WORKER POSITION

(If you happen to have more than one role, please respond in terms of thinking about your “primary” or “main” role. If your experiences in different roles are very different, we would love it if you would be so kind as to complete the survey for each of your roles).

***Is your position in a government, non-government / community managed organisation or in the private sector?***

- Government Health Services (e.g., NSW Health, Qld Health, SA Health etc)
- Non-government / community managed organisation
- Private sector
- Other (please describe): \_\_\_\_\_

***What is your current position title (as stated on your employment contract)?***

***Does this position title reflect your job role accurately?***     Yes     No

***If no, please describe why:***

***Over the last 3 months, how many hours per week (on average) were you paid for?***                      \_\_\_\_\_ hours

***Over the last 3 months, how many hours per week (on average) did you actually work?***                      \_\_\_\_\_ hours

***In terms of your current working hours, would you say:***

- I would prefer to work more hours
- My working hours are about right
- I would prefer to work fewer hours

***If you answered that you would prefer to work more hours or fewer hours, please briefly explain the reasons below***

***Is your current role***

- Permanent
- Temporary / Fixed-term contract
- Casual
- I don't know

***Is your current position focused on inpatient or community services?***

- Totally / almost totally community-based
- Mainly community but some inpatient work
- About an even split between community and inpatient
- Mainly inpatient but some community work
- Totally / almost totally inpatient-based

***Please describe the mix of workers in the team you work in***

- I work with only other peer / consumer workers
- I work with mainly other peer / consumer workers and a few clinicians / mental health workers
- I work about an even mix of peer / consumer workers and clinicians / mental health workers
- I work with mainly clinicians / mental health workers and a few other peer / consumer workers
- I work with only clinicians / mental health workers

***Comments:***

***How long have you been working in your current peer / consumer worker role?***

- |                                           |                                      |                                        |
|-------------------------------------------|--------------------------------------|----------------------------------------|
| <input type="checkbox"/> Less than 1 year | <input type="checkbox"/> 1-2 years   | <input type="checkbox"/> 3-5 years     |
| <input type="checkbox"/> 6-10 years       | <input type="checkbox"/> 11-20 years | <input type="checkbox"/> Over 20 years |

***In total, how long have you worked in peer / consumer worker roles?***

- |                                           |                                      |                                        |
|-------------------------------------------|--------------------------------------|----------------------------------------|
| <input type="checkbox"/> Less than 1 year | <input type="checkbox"/> 1-2 years   | <input type="checkbox"/> 3-5 years     |
| <input type="checkbox"/> 6-10 years       | <input type="checkbox"/> 11-20 years | <input type="checkbox"/> Over 20 years |

***Have you worked in other (non peer / consumer worker) roles in mental health?***

- Yes
- No

***If yes, what was that role / were those roles (if you've held several other positions)?***

***In regard to your previous role/s, would you say that they were:***

- Quite similar to my role as a peer / consumer worker
- Sort of similar, sort of different
- Quite different to my role as a peer / consumer worker

***Any comments about similarities or differences?***

***Were you employed prior to coming in to your current position?***

- Yes     No    → ***If no, how long had you been out of work prior to this position?***

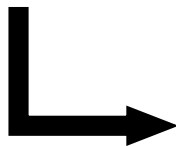

***If yes, what was your previous position?***

- As described in the previous question
- Other (please describe):

***Why did you decide to leave that position?***

**Please continue onto the next page**



*Please indicate how positive each of the following aspects are in relation to your current job*

|                                                      | Not at all positive      | A little bit positive    | Moderately positive      | Quite positive           | Very positive            |
|------------------------------------------------------|--------------------------|--------------------------|--------------------------|--------------------------|--------------------------|
| Autonomy                                             | <input type="checkbox"/> | <input type="checkbox"/> | <input type="checkbox"/> | <input type="checkbox"/> | <input type="checkbox"/> |
| Building the peer workforce                          | <input type="checkbox"/> | <input type="checkbox"/> | <input type="checkbox"/> | <input type="checkbox"/> | <input type="checkbox"/> |
| Changing culture                                     | <input type="checkbox"/> | <input type="checkbox"/> | <input type="checkbox"/> | <input type="checkbox"/> | <input type="checkbox"/> |
| Connecting with consumers                            | <input type="checkbox"/> | <input type="checkbox"/> | <input type="checkbox"/> | <input type="checkbox"/> | <input type="checkbox"/> |
| Educating others                                     | <input type="checkbox"/> | <input type="checkbox"/> | <input type="checkbox"/> | <input type="checkbox"/> | <input type="checkbox"/> |
| Empowered to deliver meaningful support              | <input type="checkbox"/> | <input type="checkbox"/> | <input type="checkbox"/> | <input type="checkbox"/> | <input type="checkbox"/> |
| Enjoyable, interesting or challenging work           | <input type="checkbox"/> | <input type="checkbox"/> | <input type="checkbox"/> | <input type="checkbox"/> | <input type="checkbox"/> |
| Flexibility                                          | <input type="checkbox"/> | <input type="checkbox"/> | <input type="checkbox"/> | <input type="checkbox"/> | <input type="checkbox"/> |
| Helping people have a voice and have their needs met | <input type="checkbox"/> | <input type="checkbox"/> | <input type="checkbox"/> | <input type="checkbox"/> | <input type="checkbox"/> |
| Innovation and service improvement                   | <input type="checkbox"/> | <input type="checkbox"/> | <input type="checkbox"/> | <input type="checkbox"/> | <input type="checkbox"/> |
| Making a difference                                  | <input type="checkbox"/> | <input type="checkbox"/> | <input type="checkbox"/> | <input type="checkbox"/> | <input type="checkbox"/> |
| Meaningful work                                      | <input type="checkbox"/> | <input type="checkbox"/> | <input type="checkbox"/> | <input type="checkbox"/> | <input type="checkbox"/> |
| Mutuality                                            | <input type="checkbox"/> | <input type="checkbox"/> | <input type="checkbox"/> | <input type="checkbox"/> | <input type="checkbox"/> |
| Pay                                                  | <input type="checkbox"/> | <input type="checkbox"/> | <input type="checkbox"/> | <input type="checkbox"/> | <input type="checkbox"/> |
| Positive culture / team relationships                | <input type="checkbox"/> | <input type="checkbox"/> | <input type="checkbox"/> | <input type="checkbox"/> | <input type="checkbox"/> |
| Role valued by others / Pride in role                | <input type="checkbox"/> | <input type="checkbox"/> | <input type="checkbox"/> | <input type="checkbox"/> | <input type="checkbox"/> |
| Self-development and learning                        | <input type="checkbox"/> | <input type="checkbox"/> | <input type="checkbox"/> | <input type="checkbox"/> | <input type="checkbox"/> |
| Support from manager / service                       | <input type="checkbox"/> | <input type="checkbox"/> | <input type="checkbox"/> | <input type="checkbox"/> | <input type="checkbox"/> |
| Supporting my own recovery                           | <input type="checkbox"/> | <input type="checkbox"/> | <input type="checkbox"/> | <input type="checkbox"/> | <input type="checkbox"/> |
| Supporting others' recovery                          | <input type="checkbox"/> | <input type="checkbox"/> | <input type="checkbox"/> | <input type="checkbox"/> | <input type="checkbox"/> |
| Using my skills and qualifications                   | <input type="checkbox"/> | <input type="checkbox"/> | <input type="checkbox"/> | <input type="checkbox"/> | <input type="checkbox"/> |
| Variety                                              | <input type="checkbox"/> | <input type="checkbox"/> | <input type="checkbox"/> | <input type="checkbox"/> | <input type="checkbox"/> |
| Other (please describe):<br>_____                    | <input type="checkbox"/> | <input type="checkbox"/> | <input type="checkbox"/> | <input type="checkbox"/> | <input type="checkbox"/> |
| Other (please describe):<br>_____                    | <input type="checkbox"/> | <input type="checkbox"/> | <input type="checkbox"/> | <input type="checkbox"/> | <input type="checkbox"/> |
| Other (please describe):<br>_____                    | <input type="checkbox"/> | <input type="checkbox"/> | <input type="checkbox"/> | <input type="checkbox"/> | <input type="checkbox"/> |
| Other (please describe):<br>_____                    | <input type="checkbox"/> | <input type="checkbox"/> | <input type="checkbox"/> | <input type="checkbox"/> | <input type="checkbox"/> |

***Please indicate how negative each of the following aspects are in relation to your current job***

|                                                                                  | Not at all negative      | A little bit negative    | Moderately negative      | Quite negative           | Very negative            |
|----------------------------------------------------------------------------------|--------------------------|--------------------------|--------------------------|--------------------------|--------------------------|
| Attitudes of clinicians / Workplace culture                                      | <input type="checkbox"/> | <input type="checkbox"/> | <input type="checkbox"/> | <input type="checkbox"/> | <input type="checkbox"/> |
| Distress about the treatment of consumers in the service                         | <input type="checkbox"/> | <input type="checkbox"/> | <input type="checkbox"/> | <input type="checkbox"/> | <input type="checkbox"/> |
| Emotional challenges / Supporting consumers experiencing high levels of distress | <input type="checkbox"/> | <input type="checkbox"/> | <input type="checkbox"/> | <input type="checkbox"/> | <input type="checkbox"/> |
| High workload / unrealistic expectations                                         | <input type="checkbox"/> | <input type="checkbox"/> | <input type="checkbox"/> | <input type="checkbox"/> | <input type="checkbox"/> |
| Isolation/ exclusion                                                             | <input type="checkbox"/> | <input type="checkbox"/> | <input type="checkbox"/> | <input type="checkbox"/> | <input type="checkbox"/> |
| Job instability / insecurity                                                     | <input type="checkbox"/> | <input type="checkbox"/> | <input type="checkbox"/> | <input type="checkbox"/> | <input type="checkbox"/> |
| Lack of career path / opportunities for advancement                              | <input type="checkbox"/> | <input type="checkbox"/> | <input type="checkbox"/> | <input type="checkbox"/> | <input type="checkbox"/> |
| Lack of engagement by consumers                                                  | <input type="checkbox"/> | <input type="checkbox"/> | <input type="checkbox"/> | <input type="checkbox"/> | <input type="checkbox"/> |
| Lack of peer workers / small workforce / high turnover                           | <input type="checkbox"/> | <input type="checkbox"/> | <input type="checkbox"/> | <input type="checkbox"/> | <input type="checkbox"/> |
| Lack of role clarity                                                             | <input type="checkbox"/> | <input type="checkbox"/> | <input type="checkbox"/> | <input type="checkbox"/> | <input type="checkbox"/> |
| Lack of understanding of the role                                                | <input type="checkbox"/> | <input type="checkbox"/> | <input type="checkbox"/> | <input type="checkbox"/> | <input type="checkbox"/> |
| Limitations in scope of role                                                     | <input type="checkbox"/> | <input type="checkbox"/> | <input type="checkbox"/> | <input type="checkbox"/> | <input type="checkbox"/> |
| Organisational structures - meetings / mandatory training                        | <input type="checkbox"/> | <input type="checkbox"/> | <input type="checkbox"/> | <input type="checkbox"/> | <input type="checkbox"/> |
| Organisational structures - Travel / Location                                    | <input type="checkbox"/> | <input type="checkbox"/> | <input type="checkbox"/> | <input type="checkbox"/> | <input type="checkbox"/> |
| Physical work environment                                                        | <input type="checkbox"/> | <input type="checkbox"/> | <input type="checkbox"/> | <input type="checkbox"/> | <input type="checkbox"/> |
| Poor management                                                                  | <input type="checkbox"/> | <input type="checkbox"/> | <input type="checkbox"/> | <input type="checkbox"/> | <input type="checkbox"/> |
| Poor pay / Lack of parity in pay / Not enough working hours                      | <input type="checkbox"/> | <input type="checkbox"/> | <input type="checkbox"/> | <input type="checkbox"/> | <input type="checkbox"/> |
| Poor team dynamics                                                               | <input type="checkbox"/> | <input type="checkbox"/> | <input type="checkbox"/> | <input type="checkbox"/> | <input type="checkbox"/> |
| Powerless to raise issues                                                        | <input type="checkbox"/> | <input type="checkbox"/> | <input type="checkbox"/> | <input type="checkbox"/> | <input type="checkbox"/> |
| Qualifications not valued                                                        | <input type="checkbox"/> | <input type="checkbox"/> | <input type="checkbox"/> | <input type="checkbox"/> | <input type="checkbox"/> |
| Reporting lines / lack of appropriate supervision                                | <input type="checkbox"/> | <input type="checkbox"/> | <input type="checkbox"/> | <input type="checkbox"/> | <input type="checkbox"/> |
| Role not valued by others                                                        | <input type="checkbox"/> | <input type="checkbox"/> | <input type="checkbox"/> | <input type="checkbox"/> | <input type="checkbox"/> |
| Stigma and discrimination / Bullying                                             | <input type="checkbox"/> | <input type="checkbox"/> | <input type="checkbox"/> | <input type="checkbox"/> | <input type="checkbox"/> |
| Workplace structures preventing optimal practice                                 | <input type="checkbox"/> | <input type="checkbox"/> | <input type="checkbox"/> | <input type="checkbox"/> | <input type="checkbox"/> |
| Other (please describe):<br>_____                                                | <input type="checkbox"/> | <input type="checkbox"/> | <input type="checkbox"/> | <input type="checkbox"/> | <input type="checkbox"/> |
| Other (please describe):<br>_____                                                | <input type="checkbox"/> | <input type="checkbox"/> | <input type="checkbox"/> | <input type="checkbox"/> | <input type="checkbox"/> |
| Other (please describe):<br>_____                                                | <input type="checkbox"/> | <input type="checkbox"/> | <input type="checkbox"/> | <input type="checkbox"/> | <input type="checkbox"/> |
| Other (please describe):<br>_____                                                | <input type="checkbox"/> | <input type="checkbox"/> | <input type="checkbox"/> | <input type="checkbox"/> | <input type="checkbox"/> |

*The next questions are related to whether you are currently considering leaving your current position.*

|                                                                                    | <i>Yes</i>               | <i>Unsure</i>            | <i>No</i>                |
|------------------------------------------------------------------------------------|--------------------------|--------------------------|--------------------------|
| I am actively looking for another job                                              | <input type="checkbox"/> | <input type="checkbox"/> | <input type="checkbox"/> |
| As soon as I can find another job, I will quit                                     | <input type="checkbox"/> | <input type="checkbox"/> | <input type="checkbox"/> |
| I often think about quitting my job                                                | <input type="checkbox"/> | <input type="checkbox"/> | <input type="checkbox"/> |
| <b><i>If you are considering quitting, what are the main reasons for this?</i></b> |                          |                          |                          |
|                                                                                    |                          |                          |                          |

## **INFORMATION ABOUT YOUR SUPPORT AND TRAINING**

***Have you completed peer-specific training or other mental health worker training (tick all that apply)?***

- Certificate IV in Mental Health Peer Work
- Certificate IV in Mental Health
- Intentional Peer Support
- Purposeful storytelling
- A health professional qualification (please specify if you are comfortable doing so):

Other (please specify below)

---



---



---



---

***Who do you currently receive Professional Development Supervision from?***

- A Senior Peer Worker / Consumer worker
- Another peer worker / consumer worker at the same level as I am
- A mental health worker who is not a peer worker / consumer worker
- Other (please specify below):

I do not receive Professional Development Supervision



***How satisfied are you with your current Professional Development Supervision arrangements***

- Very satisfied
- Satisfied
- Neither satisfied nor dissatisfied
- Dissatisfied
- Very dissatisfied
- Not applicable (I don't receive Professional Development Supervision)

Please comment on this rating:

***How satisfied are you with your current access to training and other professional development opportunities (not including Professional Development Supervision)?***

- Very satisfied
- Satisfied
- Neither satisfied nor dissatisfied
- Dissatisfied
- Very dissatisfied

Please comment on this rating:

***How satisfied are you with your current opportunities for career progression?***

- Very satisfied
- Satisfied
- Neither satisfied nor dissatisfied
- Dissatisfied
- Very dissatisfied

Please comment on this rating:

***The next questions are related to your perception of a variety of characteristics of your current position***

The first set of questions relate to **your manager**. In this survey, a “manager” is the person who monitors your work performance, approves leave and authorises your pay. If you do not have a manager, please select “I do not have a manager” and move on to the next question.

- I do not have a manager. Please move on to the next question. (Please tick the box and then move on to the next question)

|                                                                             | <i>Strongly disagree</i> | <i>Disagree</i>          | <i>Neutral</i>           | <i>Agree</i>             | <i>Strongly Agree</i>    |
|-----------------------------------------------------------------------------|--------------------------|--------------------------|--------------------------|--------------------------|--------------------------|
| My achievements are recognised by my manager                                | <input type="checkbox"/> | <input type="checkbox"/> | <input type="checkbox"/> | <input type="checkbox"/> | <input type="checkbox"/> |
| My manager is concerned about the welfare of the people that work for them. | <input type="checkbox"/> | <input type="checkbox"/> | <input type="checkbox"/> | <input type="checkbox"/> | <input type="checkbox"/> |
| My manager inspires me to do my best work                                   | <input type="checkbox"/> | <input type="checkbox"/> | <input type="checkbox"/> | <input type="checkbox"/> | <input type="checkbox"/> |
| My manager uses their influence to help me solve problems                   | <input type="checkbox"/> | <input type="checkbox"/> | <input type="checkbox"/> | <input type="checkbox"/> | <input type="checkbox"/> |

The next set of questions relate to **your Professional Development Supervisor**. In this survey, “Professional Development Supervisor” is the person who supports you to reflect on your work and assist you to apply your lived experience in a purposeful way in your role. If you do not have a Professional Development Supervisor, please select “I do not have a Professional Development Supervisor” and move on to the next question. If your supervisor is the same person as your manager, please select “My Professional Development Supervisor is the same person as my manager” and then move on to the next question.

- I do not have a Professional Development Supervisor. (Please tick the box and then move on to the next question.)
- My Professional Development Supervisor is the same person as my manager. (Please tick the box and then move on to the next question.)

|                                                                               | <i>Strongly disagree</i> | <i>Disagree</i>          | <i>Neutral</i>           | <i>Agree</i>             | <i>Strongly Agree</i>    |
|-------------------------------------------------------------------------------|--------------------------|--------------------------|--------------------------|--------------------------|--------------------------|
| My achievements are recognised by my supervisor                               | <input type="checkbox"/> | <input type="checkbox"/> | <input type="checkbox"/> | <input type="checkbox"/> | <input type="checkbox"/> |
| My supervisor is concerned about the welfare of the people that work for them | <input type="checkbox"/> | <input type="checkbox"/> | <input type="checkbox"/> | <input type="checkbox"/> | <input type="checkbox"/> |
| My supervisor inspires me to do my best work                                  | <input type="checkbox"/> | <input type="checkbox"/> | <input type="checkbox"/> | <input type="checkbox"/> | <input type="checkbox"/> |
| My supervisor uses their influence to help me solve problems                  | <input type="checkbox"/> | <input type="checkbox"/> | <input type="checkbox"/> | <input type="checkbox"/> | <input type="checkbox"/> |

***Please rate your level of agreement with each of the following statements in relation to your current position:***

|                                                                                                                 | <i>Strongly disagree</i> | <i>Disagree</i>          | <i>Neutral</i>           | <i>Agree</i>             | <i>Strongly Agree</i>    |
|-----------------------------------------------------------------------------------------------------------------|--------------------------|--------------------------|--------------------------|--------------------------|--------------------------|
| The job requires me to keep track of more than one thing at a time                                              | <input type="checkbox"/> | <input type="checkbox"/> | <input type="checkbox"/> | <input type="checkbox"/> | <input type="checkbox"/> |
| My work requires a lot of concentration                                                                         | <input type="checkbox"/> | <input type="checkbox"/> | <input type="checkbox"/> | <input type="checkbox"/> | <input type="checkbox"/> |
| The job gives me a chance to use my personal initiative or judgment in carrying out the work                    | <input type="checkbox"/> | <input type="checkbox"/> | <input type="checkbox"/> | <input type="checkbox"/> | <input type="checkbox"/> |
| Only the management decides what everybody has to do                                                            | <input type="checkbox"/> | <input type="checkbox"/> | <input type="checkbox"/> | <input type="checkbox"/> | <input type="checkbox"/> |
| My work is emotionally demanding                                                                                | <input type="checkbox"/> | <input type="checkbox"/> | <input type="checkbox"/> | <input type="checkbox"/> | <input type="checkbox"/> |
| The job gives me considerable opportunity for independence and freedom in how I do the work                     | <input type="checkbox"/> | <input type="checkbox"/> | <input type="checkbox"/> | <input type="checkbox"/> | <input type="checkbox"/> |
| I always have enough time to perform my tasks                                                                   | <input type="checkbox"/> | <input type="checkbox"/> | <input type="checkbox"/> | <input type="checkbox"/> | <input type="checkbox"/> |
| I receive feedback on my performance from other people in my organization (such as my manager or coworkers)     | <input type="checkbox"/> | <input type="checkbox"/> | <input type="checkbox"/> | <input type="checkbox"/> | <input type="checkbox"/> |
| I get enough feedback about the quality of my performance                                                       | <input type="checkbox"/> | <input type="checkbox"/> | <input type="checkbox"/> | <input type="checkbox"/> | <input type="checkbox"/> |
| My colleagues are willing to give me help if I ask for it                                                       | <input type="checkbox"/> | <input type="checkbox"/> | <input type="checkbox"/> | <input type="checkbox"/> | <input type="checkbox"/> |
| My job is physically taxing                                                                                     | <input type="checkbox"/> | <input type="checkbox"/> | <input type="checkbox"/> | <input type="checkbox"/> | <input type="checkbox"/> |
| It is physically taxing for me to get used to my working times                                                  | <input type="checkbox"/> | <input type="checkbox"/> | <input type="checkbox"/> | <input type="checkbox"/> | <input type="checkbox"/> |
| My achievements are recognised by my colleagues                                                                 | <input type="checkbox"/> | <input type="checkbox"/> | <input type="checkbox"/> | <input type="checkbox"/> | <input type="checkbox"/> |
| My performance is rewarded properly                                                                             | <input type="checkbox"/> | <input type="checkbox"/> | <input type="checkbox"/> | <input type="checkbox"/> | <input type="checkbox"/> |
| The job allows me to make my own decisions about how to schedule my work                                        | <input type="checkbox"/> | <input type="checkbox"/> | <input type="checkbox"/> | <input type="checkbox"/> | <input type="checkbox"/> |
| My working hours allow me to meet my family and personal obligations                                            | <input type="checkbox"/> | <input type="checkbox"/> | <input type="checkbox"/> | <input type="checkbox"/> | <input type="checkbox"/> |
| My physical working conditions – climate, light, noise, design of the working place, and material – are alright | <input type="checkbox"/> | <input type="checkbox"/> | <input type="checkbox"/> | <input type="checkbox"/> | <input type="checkbox"/> |
| My job requires working very hard or very fast                                                                  | <input type="checkbox"/> | <input type="checkbox"/> | <input type="checkbox"/> | <input type="checkbox"/> | <input type="checkbox"/> |
| I feel my job is secure                                                                                         | <input type="checkbox"/> | <input type="checkbox"/> | <input type="checkbox"/> | <input type="checkbox"/> | <input type="checkbox"/> |
| My contact with persons to whom I offer services is demanding                                                   | <input type="checkbox"/> | <input type="checkbox"/> | <input type="checkbox"/> | <input type="checkbox"/> | <input type="checkbox"/> |
| I have good relationships with my colleagues                                                                    | <input type="checkbox"/> | <input type="checkbox"/> | <input type="checkbox"/> | <input type="checkbox"/> | <input type="checkbox"/> |

***If you would like to explain any of your responses to the items above, please do so in the box below:***

*The final set of questions is related to your feelings about your current work.*

|                                                                                          | <i>Strongly disagree</i> | <i>Disagree</i>          | <i>Agree</i>             | <i>Strongly agree</i>    |
|------------------------------------------------------------------------------------------|--------------------------|--------------------------|--------------------------|--------------------------|
| I always find new and interesting aspects in my work.                                    | <input type="checkbox"/> | <input type="checkbox"/> | <input type="checkbox"/> | <input type="checkbox"/> |
| There are days when I feel tired before I arrive at work.                                | <input type="checkbox"/> | <input type="checkbox"/> | <input type="checkbox"/> | <input type="checkbox"/> |
| It happens more and more often that I talk about my work in a negative way.              | <input type="checkbox"/> | <input type="checkbox"/> | <input type="checkbox"/> | <input type="checkbox"/> |
| After work, I tend to need more time than in the past in order to relax and feel better. | <input type="checkbox"/> | <input type="checkbox"/> | <input type="checkbox"/> | <input type="checkbox"/> |
| I can tolerate the pressure of my work very well.                                        | <input type="checkbox"/> | <input type="checkbox"/> | <input type="checkbox"/> | <input type="checkbox"/> |
| Lately, I tend to think less at work and do my job almost mechanically.                  | <input type="checkbox"/> | <input type="checkbox"/> | <input type="checkbox"/> | <input type="checkbox"/> |
| I find my work to be a positive challenge.                                               | <input type="checkbox"/> | <input type="checkbox"/> | <input type="checkbox"/> | <input type="checkbox"/> |
| During my work, I often feel emotionally drained.                                        | <input type="checkbox"/> | <input type="checkbox"/> | <input type="checkbox"/> | <input type="checkbox"/> |
| Over time, one can become disconnected from this type of work.                           | <input type="checkbox"/> | <input type="checkbox"/> | <input type="checkbox"/> | <input type="checkbox"/> |
| After working, I have enough energy for my leisure activities.                           | <input type="checkbox"/> | <input type="checkbox"/> | <input type="checkbox"/> | <input type="checkbox"/> |
| Sometimes I feel sickened by my work tasks.                                              | <input type="checkbox"/> | <input type="checkbox"/> | <input type="checkbox"/> | <input type="checkbox"/> |
| After my work, I usually feel worn out and weary.                                        | <input type="checkbox"/> | <input type="checkbox"/> | <input type="checkbox"/> | <input type="checkbox"/> |
| This is the only type of work that I can imagine myself doing.                           | <input type="checkbox"/> | <input type="checkbox"/> | <input type="checkbox"/> | <input type="checkbox"/> |
| Usually, I can manage the amount of my work well.                                        | <input type="checkbox"/> | <input type="checkbox"/> | <input type="checkbox"/> | <input type="checkbox"/> |
| I feel more and more engaged in my work.                                                 | <input type="checkbox"/> | <input type="checkbox"/> | <input type="checkbox"/> | <input type="checkbox"/> |
| When I work, I usually feel energized.                                                   | <input type="checkbox"/> | <input type="checkbox"/> | <input type="checkbox"/> | <input type="checkbox"/> |

*If you would like to explain any of your responses to the items above, please do so in the box below:*

*If you have any final comments about your overall experiences in your peer worker / consumers worker position, please list these in the box below.*

**Thank you for completing this questionnaire.**

If completing this questionnaire has raised any issues which are concerning or that you would like to discuss, you can access free, professional and strictly confidential counselling and support services through the Employee Assistance Program at your workplace or Lifeline on 13 11 14.
